# Supplementary material for: Melanoma Brain Metastases in the Era of Targeted Therapy and Checkpoint Inhibitor Therapy
Source: PubMed Central journal article supplement (PMC8037963; doi:10.3390/cancers13071489), 2021-03-24
Supplement: cancers-13-01489-s001.pdf [file cancers-13-01489-s001.pdf]

# Supplementary Material: Melanoma Brain Metastases in the Era of Targeted Therapy and Checkpoint Inhibitor Therapy

John M. Rieth, Umang Swam, Sarah L. Mott, Mario Zanaty, Michael D. Henry, Aaron D. Bossler, Jeremy D. Greenlee, Yousef Zakharia, Marion Vanneste, Brooke Jennings and Mohammed M. Milhem

**Table S1.** Univariate and multivariable analysis for OS.

| Variable                           | Comparison     | Overall Survival |        |      |         |
|------------------------------------|----------------|------------------|--------|------|---------|
|                                    |                | Hazard Ratio     | 95% CI |      | P-value |
| Sex                                | Male vs Female | 1.09             | 0.80   | 1.49 | 0.57    |
| Brain met on diagnosis?            | Yes vs No      | 1.04             | 0.73   | 1.49 | 0.81    |
| Number of brain mets               | 3+ vs 1-2      | 2.11             | 1.57   | 2.82 | <0.01   |
| ECOG                               | 1 vs 0         | 1.61             | 1.13   | 2.29 | <0.01   |
|                                    | 2-4 vs 0       | 4.15             | 2.79   | 6.18 | -       |
| Therapy prior to brain met?        | Yes vs No      | 0.84             | 0.63   | 1.13 | 0.25    |
| Initial Size of Largest Met (cm)   | 2+ vs <2       | 1.05             | 0.79   | 1.40 | 0.73    |
| Metastatic Disease at BM diagnosis | Yes vs No      | 2.53             | 1.58   | 4.05 | <0.01   |
| Osseous Metastasis                 | Yes vs No      | 1.58             | 1.14   | 2.19 | <0.01   |
| Visceral Metastasis                | Yes vs No      | 1.91             | 1.35   | 2.71 | <0.01   |
| SRS                                | Yes vs No      | 0.52             | 0.38   | 0.71 | <0.01   |
| Whole Brain                        | Yes vs No      | 2.87             | 2.13   | 3.87 | <0.01   |
| Surgery                            | Yes vs No      | 0.55             | 0.40   | 0.75 | <0.01   |
| BRAF/MEK                           | Yes vs No      | 1.30             | 0.90   | 1.88 | 0.16    |
| PD-1                               | Yes vs No      | 0.72             | 0.51   | 1.01 | 0.06    |
| CTLA4                              | Yes vs No      | 0.59             | 0.37   | 0.94 | 0.03    |
| Other (Chemo + Epigenetic + Other) | Yes vs No      | 1.71             | 1.25   | 2.34 | <0.01   |
| Year of Brain Met                  | Units = 1      | 0.96             | 0.93   | 1.00 | 0.07    |
| Age at Brain Met                   | Units = 10     | 1.10             | 1.00   | 1.21 | 0.05    |

**Table S2.** Univariate analysis for PFS of systemic interventions.

| Variable                           | Comparison     | Progression-Free Survival |        |      |         |
|------------------------------------|----------------|---------------------------|--------|------|---------|
|                                    |                | Hazard Ratio              | 95% CI |      | P-value |
| Sex                                | Male vs Female | 1.16                      | 0.79   | 1.7  | 0.45    |
| Brain met on diagnosis?            | Yes vs No      | 1.48                      | 0.94   | 2.32 | 0.09    |
| Number of brain mets               | 3+ vs 1-2      | 1.64                      | 1.14   | 2.37 | <0.01   |
| ECOG                               | 1 vs 0         | 1.38                      | 0.94   | 2.03 | 0.04    |
|                                    | 2-4 vs 0       | 2.05                      | 1.16   | 3.64 | -       |
| Therapy prior to brain met?        | Yes vs No      | 0.71                      | 0.50   | 1.02 | 0.07    |
| Initial Size of Largest Met (cm)   | 2+ vs <2       | 0.84                      | 0.59   | 1.21 | 0.36    |
| Metastatic Disease at BM diagnosis | Yes vs No      | 2.60                      | 1.50   | 4.53 | <0.01   |

| Variable                           | Comparison | Progression-Free Survival |        |      |         |
|------------------------------------|------------|---------------------------|--------|------|---------|
|                                    |            | Hazard Ratio              | 95% CI |      | P-value |
| Osseous Metastasis                 | Yes vs No  | 1.75                      | 1.16   | 2.63 | <0.01   |
| Visceral Metastasis                | Yes vs No  | 1.97                      | 1.30   | 2.98 | <0.01   |
| SRS                                | Yes vs No  | 0.67                      | 0.46   | 0.98 | 0.04    |
| Surgery                            | Yes vs No  | 0.55                      | 0.38   | 0.81 | <0.01   |
| BRAF/MEK                           | Yes vs No  | 1.37                      | 0.89   | 2.11 | 0.15    |
| PD-1                               | Yes vs No  | 0.90                      | 0.61   | 1.31 | 0.57    |
| CTLA4                              | Yes vs No  | 0.76                      | 0.47   | 1.25 | 0.29    |
| Other (Chemo + Epigenetic + Other) | Yes vs No  | 2.55                      | 1.77   | 3.68 | <0.01   |
| Year of Brain Met                  | Units=1    | 0.96                      | 0.92   | 1.01 | 0.10    |
| Age at Brain Met                   | Units=10   | 1.04                      | 0.92   | 1.17 | 0.53    |

**Publisher's Note:** MDPI stays neutral with regard to jurisdictional claims in published maps and institutional affiliations.

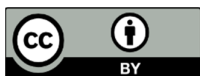

© 2021 by the authors. Licensee MDPI, Basel, Switzerland. This article is an open access article distributed under the terms and conditions of the Creative Commons Attribution (CC BY) license (<http://creativecommons.org/licenses/by/4.0/>).
